# Supplementary material for: Mental Health and Traumatization of Newly Arrived Asylum Seeker Adults in Finland: A Population-Based Study
Source: MDPI journal article supplement (doi:10.3390/ijerph18137160), 2021-07-04
Supplement: s1 [file s1]

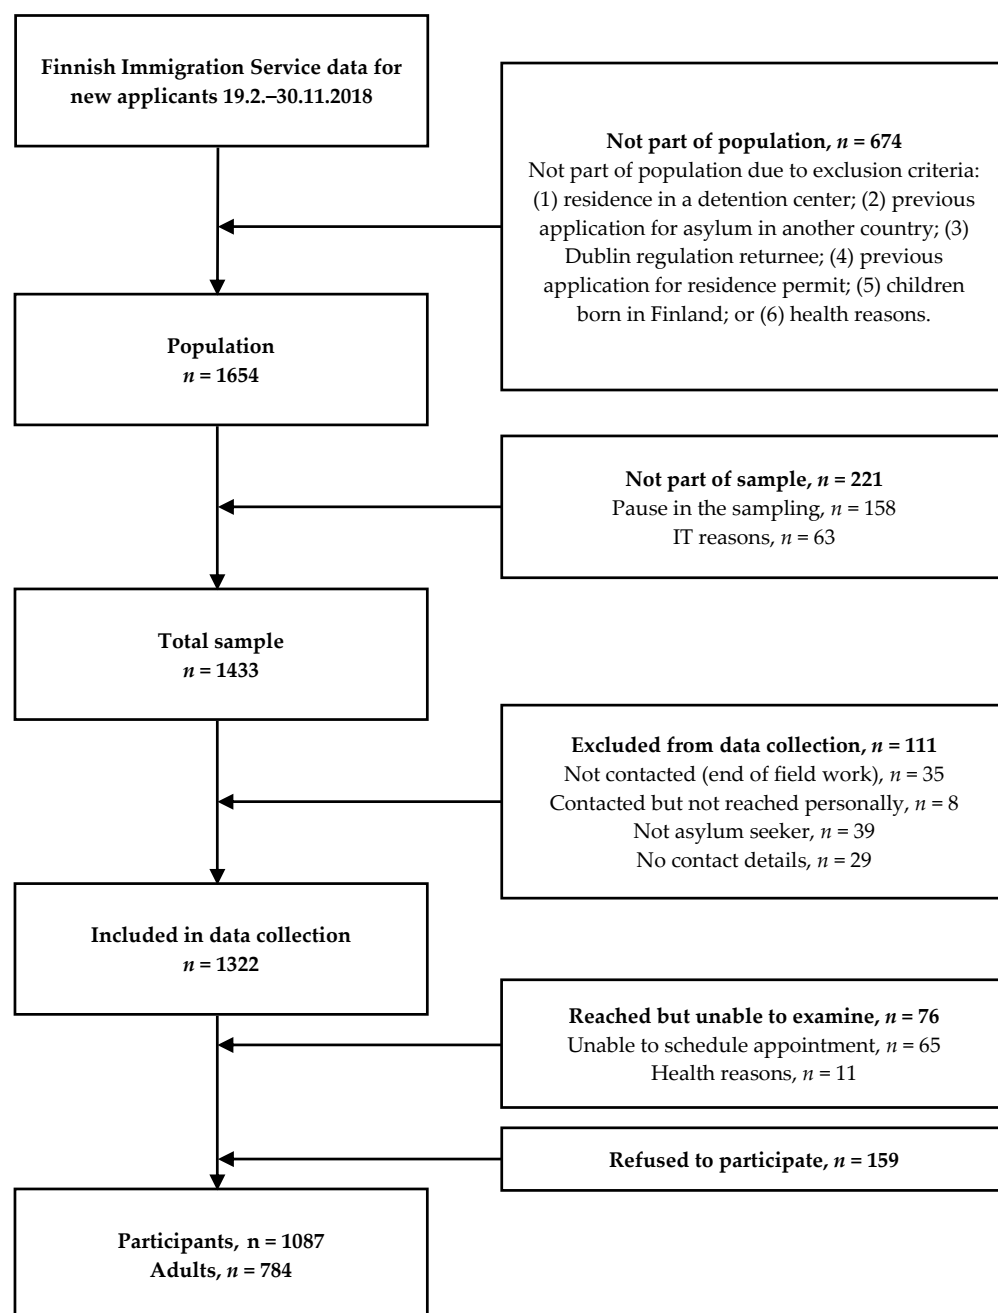

**Figure S1.** The sampling and data collection process.

**Table S1.** Age-adjusted prevalence of potentially traumatic events (PTEs) by region of origin before the asylum-seeking journey.

| Reported PTEs before the Journey | Region of Origin                             |                                        |                                                     |                                        | Total<br>Total <i>n</i> = 769<br>% (CI) |
|----------------------------------|----------------------------------------------|----------------------------------------|-----------------------------------------------------|----------------------------------------|-----------------------------------------|
|                                  | Russia/FSU<br>Total <i>n</i> = 229<br>% (CI) | MENA<br>Total <i>n</i> = 332<br>% (CI) | Africa (excl. NA)<br>Total <i>n</i> = 125<br>% (CI) | Other<br>Total <i>n</i> = 83<br>% (CI) |                                         |
|                                  |                                              |                                        |                                                     |                                        |                                         |
| Combat situations                |                                              |                                        |                                                     |                                        |                                         |
| Male                             | 20.3 (16.6–24.5)                             | 31.3 (27.6–35.3)                       | 44.0 (37.4–50.9)                                    | 35.0 (27.6–43.2)                       | 30.6 (28.2–33.2)                        |
| Female                           | 13.7 (10.1–18.3)                             | 28.1 (23.6–33.1)                       | 46.1 (38.0–54.4)                                    | 42.8 (32.0–54.3)                       | 28.6 (25.6–31.8)                        |
| Total                            | 17.6 (14.9–20.6)                             | 30.0 (27.1–33.1)                       | 45.0 (39.8–50.4)                                    | 37.9 (31.6–44.5)                       | 29.8 (27.9–31.8)                        |
| Natural disaster                 |                                              |                                        |                                                     |                                        |                                         |
| Male                             | 14.9 (11.7–18.8)                             | 26.2 (22.8–29.9)                       | 12.5 (8.6–17.7)                                     | 23.6 (17.3–31.3)                       | 20.4 (18.3–22.7)                        |
| Female                           | 11.5 (8.2–15.8)                              | 18.8 (15.2–22.9)                       | 14.7 (9.4–22.1)                                     | 32.6 (23.0–43.9)                       | 17.6 (15.2–20.3)                        |
| Total                            | 13.5 (11.1–16.3)                             | 23.2 (20.6–25.9)                       | 13.5 (10.2–17.7)                                    | 26.9 (21.5–33.2)                       | 19.3 (17.7–21.0)                        |
| Seeing violent injury or death   |                                              |                                        |                                                     |                                        |                                         |
| Male                             | 51.8 (46.8–56.7)                             | 61.1 (57.0–65.0)                       | 75.2 (69.0–80.5)                                    | 63.4 (55.4–70.8)                       | 61.0 (58.3–63.6)                        |

|                         |                  |                  |                   |                  |                  |
|-------------------------|------------------|------------------|-------------------|------------------|------------------|
| Female                  | 33.8 (28.4–39.6) | 35.6 (30.7–40.8) | 64.1 (55.9–71.6)  | 57.2 (45.8–67.9) | 42.3 (38.9–45.7) |
| Total                   | 44.5 (40.7–48.3) | 50.8 (47.6–53.9) | 70.9 (65.9–75.3)  | 60.5 (54.0–66.8) | 53.4 (51.3–55.5) |
| Physical harm           |                  |                  |                   |                  |                  |
| Male                    | 77.9 (73.4–81.7) | 47.9 (43.8–52.0) | 78.0 (71.6–83.3)  | 63.2 (55.2–70.6) | 62.9 (60.2–65.5) |
| Female                  | 51.2 (45.3–57.1) | 28.8 (24.3–33.8) | 58.8 (50.1–67.0)  | 42.6 (31.8–54.2) | 41.9 (38.6–45.3) |
| Total                   | 67.0 (63.4–70.5) | 40.2 (37.1–43.3) | 70.2 (65.1–74.9)  | 54.8 (48.3–61.1) | 54.4 (52.3–56.5) |
| Physical violence       |                  |                  |                   |                  |                  |
| Male                    | 69.3 (64.5–73.7) | 45.0 (40.9–49.1) | 79.1 (73.1–84.0)  | 58.1 (49.9–65.8) | 58.5 (55.9–61.2) |
| Female                  | 31.6 (26.4–37.3) | 24.2 (20.1–28.9) | 63.5 (54.9–71.4)  | 36.3 (26.1–48.0) | 34.6 (31.5–37.9) |
| Total                   | 53.8 (50.1–57.4) | 36.5 (33.5–39.6) | 73.0 (68.0–77.4)  | 49.1 (42.6–55.5) | 48.8 (46.7–50.9) |
| Imprisoned or kidnapped |                  |                  |                   |                  |                  |
| Male                    | 42.7 (37.8–47.7) | 28.8 (25.2–32.7) | 51.0 (44.1–57.8)  | 30.9 (24.0–38.9) | 36.2 (33.7–38.9) |
| Female                  | 9.3 (6.4–13.2)   | 16.6 (13.1–20.9) | 27.7 (20.8–35.8)  | 28.4 (18.3–41.3) | 17.8 (15.2–20.7) |
| Total                   | 28.8 (25.6–32.3) | 23.8 (21.1–26.6) | 41.5 (36.4–46.8)  | 29.5 (23.5–36.3) | 28.7 (26.8–30.7) |
| Torture                 |                  |                  |                   |                  |                  |
| Male                    | 46.2 (41.3–51.3) | 41.8 (37.8–46.0) | 57.8 (50.9–64.3)  | 49.9 (42.0–57.8) | 46.4 (43.7–49.1) |
| Female                  | 7.2 (4.7–10.9)   | 32.0 (27.4–37.1) | 37.2 (29.4–45.8)  | 37.3 (26.6–49.4) | 26.4 (23.5–29.6) |
| Total                   | 30.0 (26.7–33.5) | 37.8 (34.7–41.0) | 49.5 (44.2–54.8)  | 44.5 (38.0–51.1) | 38.2 (36.2–40.3) |
| Sexual violence         |                  |                  |                   |                  |                  |
| Male                    | 5.8 (3.9–8.7)    | 6.3 (4.5–8.7)    | 15.5 (11.2–21.2)  | 1.8 <sup>1</sup> | 7.0 (5.7–8.5)    |
| Female                  | 14.9 (11.1–19.6) | 14.9 (11.7–18.7) | 35.1 (27.5–43.5)  | 24.1 (15.6–35.3) | 19.4 (16.8–22.1) |
| Total                   | 9.5 (7.5–12.0)   | 9.8 (8.1–11.9)   | 23.5 (19.3–28.3)  | 10.6 (7.1–15.5)  | 12.0 (10.7–13.5) |
| Forced or cheated       |                  |                  |                   |                  |                  |
| Male                    | 37.1 (32.4–42.0) | 32.9 (29.2–37.0) | 43.8 (37.1–50.6)  | 38.9 (31.4–47.0) | 36.1 (33.5–38.7) |
| Female                  | 25.9 (21.1–31.3) | 27.7 (23.3–32.6) | 45.8 (37.5–54.2)  | 23.5 (15.2–34.5) | 30.3 (27.3–33.6) |
| Total                   | 32.4 (29.0–36.1) | 30.8 (27.9–33.9) | 44.8 (39.5–50.3)  | 32.7 (26.9–39.1) | 33.7 (31.7–35.8) |
| Any PTE                 |                  |                  |                   |                  |                  |
| Male                    | 85.7 (81.8–88.9) | 86.4 (83.3–89.0) | 94.6 <sup>1</sup> | 83.9 (77.3–88.8) | 87.3 (85.4–89.0) |
| Female                  | 71.5 (65.9–76.5) | 67.4 (62.4–72.1) | 85.3 (77.9–90.5)  | 82.6 (73.6–89.0) | 73.1 (70.0–76.0) |
| Total                   | 79.9 (76.7–82.8) | 78.6 (75.9–81.2) | 90.8 (87.1–93.5)  | 83.0 (77.7–87.3) | 81.5 (79.8–83.1) |

FSU, former Soviet Union; MENA, Middle-East and North Africa; Africa (excl. NA), Africa excluding North Africa; CI, confidence interval, <sup>1</sup> Confidence interval cannot be calculated due to low or high frequency.

**Table S2.** Age-adjusted prevalence of potentially traumatic events (PTEs) during the asylum-seeking journey by region of origin.

| Reported PTEs during the Journey | Region of Origin                             |                                        |                                                     |                                        | Total<br>Total <i>n</i> = 769<br>% (CI) |
|----------------------------------|----------------------------------------------|----------------------------------------|-----------------------------------------------------|----------------------------------------|-----------------------------------------|
|                                  | Russia/FSU<br>Total <i>n</i> = 229<br>% (CI) | MENA<br>Total <i>n</i> = 332<br>% (CI) | Africa (excl. NA)<br>Total <i>n</i> = 125<br>% (CI) | Other<br>Total <i>n</i> = 83<br>% (CI) |                                         |
|                                  |                                              |                                        |                                                     |                                        |                                         |
| Combat situations                |                                              |                                        |                                                     |                                        |                                         |
| Male                             | 0.0 <sup>1</sup>                             | 0.5 <sup>1</sup>                       | 5.5 <sup>1</sup>                                    | 1.8 <sup>1</sup>                       | 1.3 (0.8–2.0)                           |
| Female                           | 0.0 <sup>1</sup>                             | 0.7 <sup>1</sup>                       | 1.7 <sup>1</sup>                                    | 0.0 <sup>1</sup>                       | 0.6 <sup>1</sup>                        |
| Total                            | 0.0 <sup>1</sup>                             | 0.6 <sup>1</sup>                       | 3.8 (2.3–6.3)                                       | 1.1 <sup>1</sup>                       | 1.0 (0.7–1.5)                           |
| Natural disaster                 |                                              |                                        |                                                     |                                        |                                         |
| Male                             | 0.0 <sup>1</sup>                             | 0.7 <sup>1</sup>                       | 0.0 <sup>1</sup>                                    | 0.0 <sup>1</sup>                       | 0.3 <sup>1</sup>                        |
| Female                           | 0.0 <sup>1</sup>                             | 0.0 <sup>1</sup>                       | 5.2 <sup>1</sup>                                    | 0.0 <sup>1</sup>                       | 0.9 <sup>1</sup>                        |
| Total                            | 0.0 <sup>1</sup>                             | 0.4 <sup>1</sup>                       | 2.3 <sup>1</sup>                                    | 0.0 <sup>1</sup>                       | 0.6 <sup>1</sup>                        |
| Seeing violent injury or death   |                                              |                                        |                                                     |                                        |                                         |
| Male                             | 0.7 <sup>1</sup>                             | 4.5 (3.1–6.6)                          | 17.6 (12.9–23.5)                                    | 3.5 <sup>1</sup>                       | 5.4 (4.3–6.7)                           |
| Female                           | 0.0 <sup>1</sup>                             | 1.4 <sup>1</sup>                       | 21.8 (15.4–29.9)                                    | 0.0 <sup>1</sup>                       | 4.4 (3.2–6.1)                           |
| Total                            | 0.4 <sup>1</sup>                             | 3.3 (2.3–4.6)                          | 19.7 (15.5–24.7)                                    | 2.2 <sup>1</sup>                       | 5.0 (4.1–6.0)                           |
| Physical harm                    |                                              |                                        |                                                     |                                        |                                         |
| Male                             | 0.7 <sup>1</sup>                             | 4.2 (2.9–6.1)                          | 22.6 (17.2–29.1)                                    | 3.5 <sup>1</sup>                       | 6.1 (4.9–7.5)                           |
| Female                           | 1.1 <sup>1</sup>                             | 2.8 <sup>1</sup>                       | 22.1 (15.7–30.2)                                    | 2.9 <sup>1</sup>                       | 5.6 (4.2–7.4)                           |
| Total                            | 0.9 <sup>1</sup>                             | 3.7 (2.7–5.1)                          | 3.7 (2.7–5.1)                                       | 3.3 <sup>1</sup>                       | 5.9 (5.0–7.0)                           |
| Physical violence                |                                              |                                        |                                                     |                                        |                                         |
| Male                             | 0.7 <sup>1</sup>                             | 3.3 (2.2–5.0)                          | 14.0 (9.9–19.4)                                     | 3.6 <sup>1</sup>                       | 4.4 (3.5–5.6)                           |
| Female                           | 1.1 <sup>1</sup>                             | 2.1 <sup>1</sup>                       | 21.4 (15.1–29.5)                                    | 2.9 <sup>1</sup>                       | 5.3 (3.9–7.1)                           |
| Total                            | 0.9 <sup>1</sup>                             | 2.8 (2.0–4.0)                          | 17.1 (13.2–21.9)                                    | 3.3 <sup>1</sup>                       | 4.8 (4.0–5.8)                           |
| Imprisoned or kidnapped          |                                              |                                        |                                                     |                                        |                                         |
| Male                             | 0.0 <sup>1</sup>                             | 3.8 (2.6–5.7)                          | 12.8 (9.0–18.1)                                     | 5.3 <sup>1</sup>                       | 4.5 (3.5–5.7)                           |
| Female                           | 2.1 <sup>1</sup>                             | 4.6 (2.7–7.6)                          | 23.1 (16.5–31.3)                                    | 0.0 <sup>1</sup>                       | 6.5 (5.0–8.5)                           |
| Total                            | 0.9 <sup>1</sup>                             | 4.1 (3.0–5.6)                          | 16.9 (13.1–21.6)                                    | 3.3 <sup>1</sup>                       | 5.3 (4.4–6.3)                           |
| Torture                          |                                              |                                        |                                                     |                                        |                                         |

|                   |                  |                  |                               |                  |                  |
|-------------------|------------------|------------------|-------------------------------|------------------|------------------|
| Male              | 0.0 <sup>1</sup> | 4.3 (2.9–6.4)    | 13.1 (9.1–18.6)               | 3.5 <sup>1</sup> | 4.5 (3.5–5.8)    |
| Female            | 0.0 <sup>1</sup> | 3.5 <sup>1</sup> | 19.7 (13.6–27.7)              | 0.0 <sup>1</sup> | 5.0 (3.6–6.8)    |
| Total             | 0.0 <sup>1</sup> | 4.1 (2.9–5.7)    | 15.9 (12.1–20.7)              | 2.2 <sup>1</sup> | 4.7 (3.8–5.7)    |
| Sexual violence   |                  |                  |                               |                  |                  |
| Male              | 0.0 <sup>1</sup> | 0.5 <sup>1</sup> | 2.8 <sup>1</sup>              | 1.8 <sup>1</sup> | 0.9 <sup>1</sup> |
| Female            | 0.0 <sup>1</sup> | 2.8 <sup>1</sup> | 27.6 (20.7–35.8) <sup>2</sup> | 0.0 <sup>1</sup> | 6.0 (4.5–7.8)    |
| Total             | 0.0 <sup>1</sup> | 1.4 (0.9–2.4)    | 13.6 (10.2–17.8)              | 1.1 <sup>1</sup> | 2.9 (2.3–3.8)    |
| Forced or cheated |                  |                  |                               |                  |                  |
| Male              | 0.0 <sup>1</sup> | 1.0 <sup>1</sup> | 11.9 (8.1–17.2)               | 3.5 <sup>1</sup> | 2.8 (2.0–3.8)    |
| Female            | 0.0 <sup>1</sup> | 4.3 (2.7–6.8)    | 34.4 (26.8–43.0)              | 0.0 <sup>1</sup> | 7.8 (6.2–9.8)    |
| Total             | 0.0 <sup>1</sup> | 2.3 (1.5–3.4)    | 21.1 (17.0–25.8)              | 2.2 <sup>1</sup> | 4.8 (4.0–5.8)    |
| Any PTE           |                  |                  |                               |                  |                  |
| Male              | 1.5 <sup>1</sup> | 13.3 (10.7–16.3) | 28.0 (22.2–34.6)              | 5.3 <sup>1</sup> | 11.6 (10.0–13.4) |
| Female            | 3.2 <sup>1</sup> | 8.9 (6.3–12.4)   | 43.1 (35.0–51.5)              | 2.9 <sup>1</sup> | 12.6 (10.5–15.0) |
| Total             | 2.2 (1.3–3.7)    | 11.6 (9.6–13.8)  | 34.5 (29.5–39.8)              | 4.4 <sup>1</sup> | 12.0 (10.7–13.4) |

FSU, former Soviet Union; MENA, Middle-East and North Africa; Africa (excl. NA), Africa excluding North Africa; CI, confidence interval, <sup>1</sup> Confidence interval cannot be calculated due to low or high frequency, <sup>2</sup> Unstandardized scores are reported due to small cell sizes in other categories.
